# Supplementary material for: Seroepidemiology of Borrelia burgdorferi s.l. among German National Cohort (NAKO) Participants, Hanover
Source: MDPI journal article supplement (doi:10.3390/microorganisms10112286), 2022-11-17
Supplement: s1 [file s1]

## Supplementary Material

**Article:** Seroepidemiology of *Borrelia burgdorferi* s.l. among German National Cohort (NAKO) Participants, Hanover

**Authors:** Max J. Hassenstein, Irina Janzen, Gérard Krause, Manuela Harries, Vanessa Melhorn, Tobias Kerrinnes, Yvonne Kemmling, Stefanie Castell

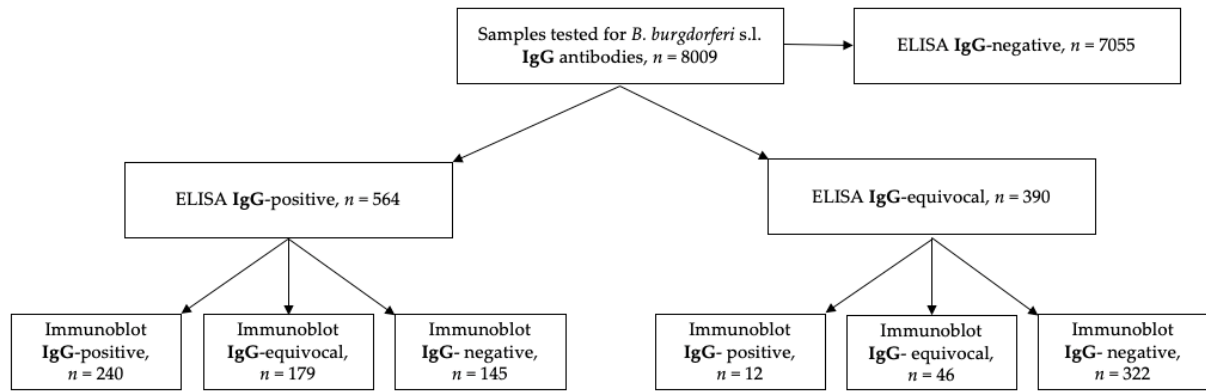

**Figure S1.** Flowchart from two-tier sample testing for IgG antibodies against *B. burgdorferi* s.l. IgG = Immunoglobulin G.

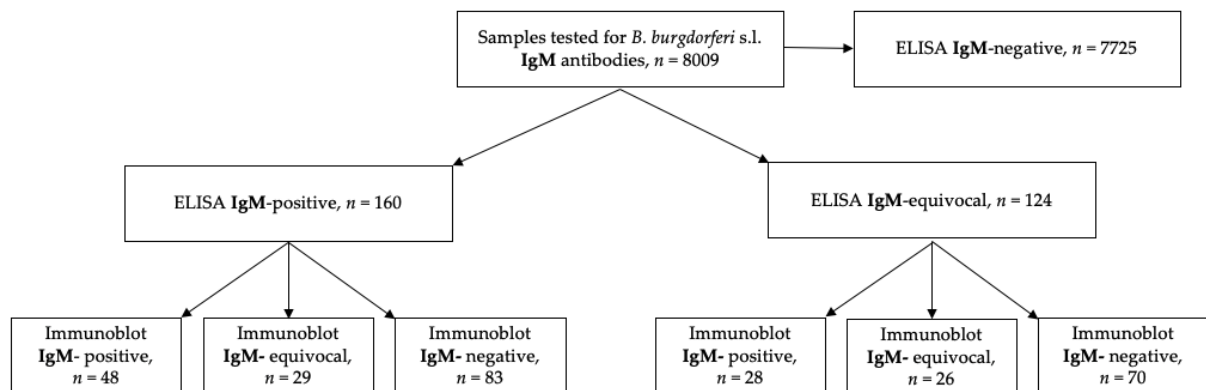

**Figure S2.** Flowchart from two-tier sample testing for IgM antibodies against *B. burgdorferi* s.l. IgM = Immunoglobulin M.

**Table S1.** Implementation and comparison of force of infection (FOI) models.

| Model                     | GLM FOI Formula <sup>1</sup>                     | GLM Implementation in R Programming Language <sup>1,2</sup>                                    | AIC    |
|---------------------------|--------------------------------------------------|------------------------------------------------------------------------------------------------|--------|
| Muench [1,2]              | $\eta(a) = \log(\beta) + \log(a)$                | glm(cbind(Positive, Total-Positive) ~ 1, offset=log(Age), family = binomial(link = "cloglog")) | 200.55 |
| Griffiths [3]             | $\eta(a) = \beta_1 a + \beta_2 a^2$              | glm(cbind(Total-, Positive) ~ -1 + Age + I(Age^2), family = binomial(link = "log"))            | 202.54 |
| Grenfell and Anderson [4] | $\eta'(a) = \beta_1 + 2\beta_2 a + 3\beta_3 a^2$ | glm(cbind(Total-, Positive) ~ -1 + Age + I(Age^2) + I(Age^3), family = binomial(link = "log")) | 192.39 |

GLM: generalized linear model; AIC: Akaike information criterion;  $\eta$ : linear predictor;  $a$ : age;  $\beta$ : transmission parameter; <sup>1</sup> as suggested by Hens et al. [5]; <sup>2</sup> The glm() call fits a generalized linear model; Positive: vector containing seropositive counts; Total: vector containing the sum of seropositives and seronegatives; Age: vector containing the participants' age in years.

**Table S2.** Odds Ratios for IgG/IgM seropositivity from logistic regression.

| Independent Variables                                         | Odds Ratio for IgG Seropositivity <sup>1</sup> (95% CI) | <i>p</i>     | Odds Ratio for IgM Seropositivity <sup>1</sup> (95% CI) | <i>p</i>     |
|---------------------------------------------------------------|---------------------------------------------------------|--------------|---------------------------------------------------------|--------------|
| <b>Age, 10-year increments</b>                                | 1.26 (1.13–1.42)                                        | <0.001       | 1.07 (0.88–1.30)                                        | 0.512        |
| <b>Sex</b>                                                    |                                                         |              |                                                         |              |
| Female                                                        | Ref.                                                    | Ref.         | Ref.                                                    | Ref.         |
| Male                                                          | 2.58 (1.94–3.46)                                        | <0.001       | 1.24 (0.78–2.00)                                        | 0.362        |
| <b>Migration background <sup>1</sup></b>                      |                                                         |              |                                                         |              |
| No                                                            | Ref.                                                    | Ref.         | Ref.                                                    | Ref.         |
| Yes                                                           | 0.71 (0.48–1.02)                                        | 0.071        | 1.02 (0.56–1.75)                                        | 0.947        |
| <b>Education <sup>2</sup></b>                                 |                                                         |              |                                                         |              |
| Ongoing                                                       | 1.03 (0.24–2.97)                                        | 0.968        | 2.49 (0.66–7.67)                                        | 0.138        |
| Low                                                           | 0.39 (0.06–1.25)                                        | 0.188        | 1.62 (0.38–4.84)                                        | 0.440        |
| Medium                                                        | Ref.                                                    | Ref.         | Ref.                                                    | Ref.         |
| High                                                          | 1.22 (0.92–1.63)                                        | 0.179        | 1.39 (0.83–2.39)                                        | 0.223        |
| <b>Net equivalent monthly income, 100-EUR increments</b>      | 1.00 (0.99–1.00)                                        | 0.325        | 0.98 (0.96–1.00)                                        | <b>0.038</b> |
| <b>Body Mass Index <sup>3</sup></b>                           | 0.96 (0.93–0.99)                                        | <b>0.021</b> | 0.95 (0.90–1.01)                                        | 0.105        |
| <b>Depression status (PHQ-9, point increase) <sup>4</sup></b> | 0.94 (0.90–0.98)                                        | <b>0.006</b> | 0.99 (0.93–1.05)                                        | 0.780        |
| <b>Smoking status</b>                                         |                                                         |              |                                                         |              |
| Never                                                         | Ref.                                                    | Ref.         | Ref.                                                    | Ref.         |
| Former                                                        | 1.10 (0.82–1.48)                                        | 0.523        | 1.40 (0.81–2.42)                                        | 0.224        |
| Current                                                       | 1.05 (0.71–1.52)                                        | 0.818        | 1.11 (0.54–2.18)                                        | 0.765        |
| Unknown                                                       | 1.30 (0.80–2.03)                                        | 0.274        | 1.38 (0.59–2.95)                                        | 0.421        |

IgG = Immunoglobulin G; IgM = Immunoglobulin M; Ref = reference; CI = confidence interval; Observations = 8009. We considered a sample as seropositive for *Borrelia burgdorferi* s.l. with positive or equivocal ELISA and subsequent positive immunoblot result (MiQ12) [6]; <sup>1</sup> Migration derived from a minimum set of indicators by Schenk et al. [7]; <sup>2</sup> Education level derived according to ISCED97 [8]; <sup>3</sup> BMI corresponding to the classification of the International Obesity Task Force [9]; <sup>4</sup> Depression status obtained from the 9-question Patient Health Questionnaire (PHQ-9) [10]

**Table S3.** Estimated mean force of infection (FOI) for IgG seropositivity against *B. burgdorferi* s.l.

| Age (years) | FOI Estimation      |                        |                                    |
|-------------|---------------------|------------------------|------------------------------------|
|             | Muench <sup>1</sup> | Griffiths <sup>2</sup> | Grenfell and Anderson <sup>3</sup> |
| 20–24       | 0.000637            | 0.000634               | 0.0000656                          |
| 25–29       | 0.000637            | 0.000637               | –0.000153                          |
| 30–34       | 0.000637            | 0.000641               | –0.000230                          |
| 35–39       | 0.000637            | 0.000644               | –0.000167                          |
| 40–44       | 0.000637            | 0.000647               | 0.0000375                          |
| 45–49       | 0.000637            | 0.000651               | 0.000383                           |
| 50–54       | 0.000637            | 0.000654               | 0.000869                           |
| 55–59       | 0.000637            | 0.000657               | 0.00150                            |
| 60–64       | 0.000637            | 0.000661               | 0.00226                            |
| 65–69       | 0.000637            | 0.000664               | 0.00317                            |

The FOI represents the average annual change in the population's seropositivity proportion. IgG = Immunoglobulin G; <sup>1</sup> Muench's model [1,2] assumes constant FOI over age; <sup>2</sup> [3]; <sup>3</sup> [4], Best performing model considering AIC.

## References

1. Muench, H. Derivation of Rates from Summation Data by the Catalytic Curve. *Journal of the American Statistical Association* **1934**, *29*, 25, doi:10.2307/2278457.
2. Muench, H. *Catalytic Models in Epidemiology*; Harvard University Press: Cambridge, MA, USA, 1959, ISBN 9780674428928.
3. Griffiths, D.A. A Catalytic Model of Infection for Measles. *Applied Statistics* **1974**, *23*, 330, doi:10.2307/2347126.
4. Grenfell, B.T.; Anderson, R.M. The estimation of age-related rates of infection from case notifications and serological data. *J. Hyg. (Lond)* **1985**, *95*, 419–436, doi:10.1017/s0022172400062859.
5. Hens, N.; Shkedy, Z.; Aerts, M.; Faes, C.; van Damme, P.; Beutels, P. *Modeling Infectious Disease Parameters Based on Serological and Social Contact Data*; Springer New York: New York, NY, 2012, ISBN 978-1-4614-4071-0.
6. *Lyme-Borreliose*; Mauch, H.; Fingerle, V.; Eiffert, H.; Gessner, A.; Göbel, U.; Hofmann, H.; Hunfeld, K.-P.; Krause, A., Eds., 2. Auflage; Urban & Fischer in Elsevier: München, 2017, ISBN 978-3-437-22605-2.
7. Schenk, L.; Bau, A.-M.; Borde, T.; Butler, J.; Lampert, T.; Neuhauser, H.; Razum, O.; Weilandt, C. Mindestindikatorensatz zur Erfassung des Migrationsstatus. Empfehlungen für die epidemiologische Praxis. *Bundesgesundheitsblatt Gesundheitsforschung Gesundheitsschutz* **2006**, *49*, 853–860, doi:10.1007/s00103-006-0018-4.
8. *International standard classification of education ISCED 1997*, English edition. - Re-edition; UNESCO-UIS: [Montreal], 2006, ISBN 92-9189-035-9.
9. Cole, T.J.; Lobstein, T. Extended international (IOTF) body mass index cut-offs for thinness, overweight and obesity. *Pediatr. Obes.* **2012**, *7*, 284–294, doi:10.1111/j.2047-6310.2012.00064.x.
10. Kroenke, K.; Spitzer, R.L. The PHQ-9: A New Depression Diagnostic and Severity Measure. *Psychiatric Annals* **2002**, *32*, 509–515, doi:10.3928/0048-5713-20020901-06.
